# Supplementary material for: Distinct Characteristics of Escherichia coli Isolated from Patients with Urinary Tract Infections in a Medical Center at a Ten-Year Interval
Source: MDPI journal article supplement (doi:10.3390/pathogens10091156), 2021-09-08
Supplement: s1 [file s1]

Table S1. The distribution of antimicrobial-resistant *E. coli* in different age groups in 2009-2010 and 2020.

[illegible]

|                                  |           |           |           |           |           |           |           |          |           |           |           |           |
|----------------------------------|-----------|-----------|-----------|-----------|-----------|-----------|-----------|----------|-----------|-----------|-----------|-----------|
| CZ <sup>a,b</sup>                | 15 (20.0) | 10 (16.1) | 9 (9.3)   | 41 (46.1) | 52 (56.5) | 39 (43.8) | 15 (25.0) | 0 (0)    | 10 (16.1) | 15 (22.7) | 21 (30.9) | 31 (46.3) |
| CXM <sup>a,b</sup>               | 15 (20.0) | 9 (14.5)  | 9 (9.3)   | 43 (48.3) | 51 (55.4) | 37 (41.6) | 14 (23.3) | 0 (0)    | 10 (16.1) | 14 (21.2) | 19 (27.9) | 28 (41.8) |
| CMZ <sup>a</sup>                 | 2 (2.7)   | 5 (8.1)   | 4 (4.1)   | 18 (20.2) | 31 (33.7) | 22 (24.7) | 1 (1.7)   | 0 (0)    | 2 (3.2)   | 2 (3.0)   | 6 (8.8)   | 6 (9.0)   |
| Extended-spectrum cephalosporins |           |           |           |           |           |           |           |          |           |           |           |           |
| CRO <sup>a,b</sup>               | 16 (21.3) | 9 (14.5)  | 9 (9.3)   | 40 (44.9) | 50 (54.3) | 37 (41.6) | 14 (23.3) | 0 (0)    | 9 (14.5)  | 15 (22.7) | 19 (27.9) | 31 (46.3) |
| CAZ <sup>a</sup>                 | 12 (16.0) | 10 (16.1) | 8 (8.2)   | 32 (36.0) | 47 (51.1) | 31 (34.8) | 10 (16.7) | 0 (0)    | 6 (9.7)   | 14 (21.2) | 13 (19.1) | 16 (23.9) |
| FEP <sup>a</sup>                 | 9 (12.0)  | 4 (6.5)   | 4 (4.1)   | 18 (20.2) | 18 (19.6) | 19 (21.3) | 10 (16.7) | 0 (0)    | 5 (8.1)   | 11 (16.7) | 10 (14.7) | 15 (22.4) |
| Cephameycins                     |           |           |           |           |           |           |           |          |           |           |           |           |
| FOX <sup>a</sup>                 | 8 (10.7)  | 7 (11.3)  | 8 (8.2)   | 27 (30.3) | 44 (47.8) | 30 (33.7) | 3 (4.9)   | 0 (0)    | 4 (6.5)   | 5 (7.6)   | 9 (13.2)  | 9 (13.4)  |
| Fluoroquinolones                 |           |           |           |           |           |           |           |          |           |           |           |           |
| CIP <sup>a,b</sup>               | 20 (26.7) | 13 (21.0) | 25 (25.8) | 42 (47.2) | 60 (65.2) | 51 (57.3) | 20 (33.3) | 4 (23.5) | 20 (32.3) | 26 (39.4) | 40 (58.8) | 39 (58.2) |
| LVX <sup>a,b</sup>               | 15 (20.0) | 9 (14.5)  | 18 (18.6) | 34 (38.2) | 50 (54.3) | 43 (48.3) | 16 (26.7) | 1 (5.9)  | 13 (21.0) | 18 (27.3) | 33 (48.5) | 36 (53.7) |
| Tetracyclines                    |           |           |           |           |           |           |           |          |           |           |           |           |
| TE                               | 46 (61.3) | 36 (58.1) | 52 (53.6) | 54 (60.7) | 54 (58.7) | 52 (58.4) | 29 (48.3) | 8 (47.1) | 27 (43.5) | 36 (54.5) | 35 (51.5) | 33 (49.3) |
| Glycylcyclines                   |           |           |           |           |           |           |           |          |           |           |           |           |
| TIG                              | 0 (0)     | 0 (0)     | 0 (0)     | 0 (0)     | 0 (0)     | 0 (0)     | 0 (0)     | 0 (0)    | 0 (0)     | 0 (0)     | 0 (0)     | 0 (0)     |
| Folate pathway inhibitors        |           |           |           |           |           |           |           |          |           |           |           |           |
| SXT <sup>a</sup>                 | 41 (54.7) | 30 (48.4) | 36 (37.1) | 47 (52.8) | 54 (58.7) | 54 (60.7) | 32 (53.3) | 6 (35.3) | 24 (38.7) | 26 (39.4) | 34 (50.0) | 24 (35.8) |
| Drug-resistance <sup>a</sup>     |           |           |           |           |           |           |           |          |           |           |           |           |
| MDR                              | 39 (52.0) | 29 (46.8) | 36 (37.1) | 54 (60.7) | 64 (70.0) | 57 (64.0) | 36 (60.0) | 7 (41.2) | 29 (46.8) | 36 (54.5) | 39 (57.4) | 40 (59.7) |
| XDR                              | 1 (1.3)   | 2 (3.2)   | 2 (2.1)   | 5 (5.6)   | 11 (12.0) | 5 (5.6)   | 0 (0)     | 0 (0)    | 2 (3.2)   | 1 (1.5)   | 5 (7.4)   | 4 (6.0)   |

<sup>a</sup>The distribution of antimicrobial resistance of *E. coli* isolated from different age groups in 2009-2010 showed a significant difference ( $p < 0.05$ ).

<sup>b</sup>The distribution of antimicrobial resistance of *E. coli* isolated from different age groups in 2020 showed a significant difference ( $p < 0.05$ ).

Abbreviations: AM, ampicillin; AMC, amoxicillin; AN, amikacin; CAZ ceftazidime, CIP, ciprofloxacin; CMZ, cefmetazole; CRO, ceftriaxone; CXM, cefuroxime; CZ, cefazolin; ETP, ertapenem; FEP, cefepime; FOX, ceftazidime; GM, gentamicin; LVX, levofloxacin; IPM, imipenem; MEM meropenem; SAM, ampicillin/sulbactam; SXT, sulfamethoxazole/trimethoprim; TE, tetracycline; TIG, tigecycline; TZP, piperacillin/tazobactam; I, intermediate resistant; R, resistant; MDR, multidrug-resistant; XDR, extensively drug-resistant.

Table S2. The distribution of virulence factors in *E. coli* in different age groups in 2009-2010 and 2020.

| Virulence factor genes       | Age group (years old)<br>in 2009-2010 |           |           |           |           |           | Age group (years old)<br>in 2020 |           |           |           |           |           |
|------------------------------|---------------------------------------|-----------|-----------|-----------|-----------|-----------|----------------------------------|-----------|-----------|-----------|-----------|-----------|
|                              | ≤3                                    | 4-20      | 21-40     | 41-60     | 61-80     | >80       | ≤3                               | 4-20      | 21-40     | 41-60     | 61-80     | >80       |
|                              | (n=75)                                | (n=62)    | (n=97)    | (n=89)    | (n=92)    | (n=89)    | (n=60)                           | (n=17)    | (n=62)    | (n=66)    | (n=68)    | (n=67)    |
| <i>papGI</i>                 | 0 (0)                                 | 0 (0)     | 0 (0)     | 0 (0)     | 0 (0)     | 0 (0)     | 0 (0)                            | 0 (0)     | 0 (0)     | 0 (0)     | 1 (1.5)   | 0 (0)     |
| <i>papGII</i> <sup>a,b</sup> | 35 (46.7)                             | 17 (27.4) | 34 (35.1) | 22 (24.7) | 17 (18.5) | 19 (21.3) | 30 (50.0)                        | 5 (29.4)  | 13 (30.0) | 11 (16.7) | 8 (11.8)  | 10 (14.9) |
| <i>papGIII</i>               | 17 (22.7)                             | 6 (9.7)   | 23 (23.7) | 16 (18.0) | 14 (15.2) | 9 (10.1)  | 4 (6.7)                          | 1 (5.9)   | 8 (12.9)  | 13 (19.7) | 7 (10.3)  | 8 (11.9)  |
| <i>sfa</i>                   | 10 (13.3)                             | 5 (8.1)   | 11 (11.3) | 6 (6.7)   | 2 (2.2)   | 9 (10.1)  | 9 (15.0)                         | 0 (0)     | 9 (14.5)  | 11 (16.7) | 6 (8.8)   | 8 (11.9)  |
| <i>foc</i> <sup>a</sup>      | 8 (10.7)                              | 13 (21.0) | 12 (12.4) | 9 (10.1)  | 5 (5.4)   | 6 (6.7)   | 12 (20.0)                        | 1 (5.9)   | 10 (16.1) | 7 (10.6)  | 5 (7.4)   | 5 (7.5)   |
| <i>cnfI</i> <sup>a,b</sup>   | 26 (34.7)                             | 17 (27.4) | 28 (28.9) | 15 (16.9) | 10 (10.9) | 16 (18.0) | 23 (38.3)                        | 6 (35.3)  | 21 (33.9) | 21 (31.8) | 10 (14.7) | 11 (16.4) |
| <i>aer</i> <sup>b</sup>      | 56 (74.7)                             | 35 (56.5) | 54 (55.7) | 56 (62.9) | 61 (66.3) | 62 (69.7) | 47 (78.3)                        | 2 (11.8)  | 28 (45.2) | 35 (53.0) | 37 (54.4) | 40 (59.7) |
| <i>usp</i> <sup>a,b</sup>    | 56 (74.7)                             | 47 (75.8) | 68 (70.1) | 52 (58.4) | 46 (50.0) | 49 (55.1) | 43 (71.7)                        | 5 (29.4)  | 32 (51.6) | 44 (66.7) | 37 (54.4) | 39 (58.2) |
| <i>iha</i>                   | 37 (49.3)                             | 22 (35.5) | 28 (28.9) | 27 (30.3) | 30 (32.6) | 36 (40.4) | 24 (40.0)                        | 4 (23.5)  | 15 (24.2) | 20 (30.3) | 21 (30.9) | 27 (40.3) |
| <i>ompT</i> <sup>a,b</sup>   | 65 (86.7)                             | 56 (90.3) | 84 (86.6) | 64 (71.9) | 63 (68.5) | 68 (76.4) | 50 (83.3)                        | 5 (29.4)  | 44 (71.0) | 52 (78.8) | 48 (70.6) | 54 (80.6) |
| <i>afa</i> <sup>b</sup>      | 39 (52.0)                             | 36 (58.1) | 44 (45.4) | 58 (65.2) | 57 (62.0) | 50 (56.2) | 45 (75.0)                        | 2 (11.8)  | 39 (62.9) | 47 (71.2) | 44 (64.7) | 40 (59.7) |
| <i>iRONE</i> <sup>b</sup>    | 31 (41.3)                             | 31 (50.0) | 45 (46.4) | 34 (38.2) | 33 (35.9) | 29 (32.6) | 24 (40.0)                        | 6 (35.3)  | 30 (48.4) | 26 (39.4) | 16 (23.5) | 19 (28.4) |
| <i>fimH</i> <sup>a</sup>     | 74 (98.7)                             | 62 (100)  | 96 (99.0) | 89 (100)  | 85 (92.4) | 84 (94.4) | 56 (93.3)                        | 14 (82.4) | 52 (83.9) | 61 (92.4) | 59 (86.8) | 61 (91.0) |
| <i>hly</i> <sup>a</sup>      | 33 (44.0)                             | 15 (24.2) | 28 (28.9) | 16 (18.0) | 16 (17.4) | 17 (19.1) | 25 (41.7)                        | 9 (52.9)  | 20 (32.3) | 18 (27.3) | 15 (22.1) | 18 (26.9) |
| <i>sat</i> <sup>a</sup>      | 36 (48.0)                             | 16 (25.8) | 25 (25.8) | 24 (27.0) | 30 (32.6) | 34 (38.2) | 28 (46.7)                        | 2 (11.8)  | 25 (40.3) | 22 (33.3) | 33 (48.5) | 29 (43.3) |
| <i>K1</i> <sup>a</sup>       | 18 (24.0)                             | 27 (43.5) | 37 (38.1) | 16 (18.0) | 11 (12.0) | 17 (19.1) | 11 (18.3)                        | 5 (29.4)  | 15 (24.2) | 13 (19.7) | 14 (20.6) | 17 (25.4) |

<sup>a</sup>The distribution of virulence factors in *E. coli* isolated from different age groups in 2009-2010 showed a significant difference ( $p < 0.05$ ).

<sup>b</sup>The distribution of virulence factors in *E. coli* isolated from different age groups in 2020 showed a significant difference ( $p < 0.05$ ).

**Table S3.** Oligonucleotide primers used in this study

| Primer                             | Sequence (5'-3')          | Reference |
|------------------------------------|---------------------------|-----------|
| <b>Virulence factors detection</b> |                           |           |
| afa-F                              | CGGCTTTTCTGCTGAACTGGCAGGC | [1]       |
| afa-R                              | CCGTCAGCCCCCACGGCAGACC    |           |
| iroN-F                             | AAGTCAAAGCAGGGGTGCCCCG    | [2]       |
| iroN-R                             | GACGCCGACATTAAGACGCAG     |           |
| usp-1                              | CGGCTCTTACATCGGTGCGTTG    | [3]       |
| usp-2                              | GACATATCCAGCCAGCGAGTTC    |           |
| foc-F                              | GGTGAACCGCAGAAAATAC       | [4]       |
| foc-R                              | GAACTGTTGGGGAAAGAGTG      |           |
| sfa-F                              | GGATGTTTCTTTGGGTAATCTG    | [4]       |
| sfa-R                              | CATTCCCTGTATTCGCATAG      |           |
| iha-F                              | CTGGCGGAGGCTCTGAGATCA     | [2]       |
| iha-R                              | TCCTTAAGCTCCCGCGGCTGA     |           |
| ompT-F                             | ATCTAGCCGAAGAAGGAGGC      | [5]       |
| ompT-R                             | CCCGGGTCATAGTGTTCATC      |           |
| papGI-F                            | TCGTGCTCAGGTCCGGAATTT     | [6]       |
| papGI-R                            | TGGCATCCCCCAACATTATCG     |           |
| papGII-F                           | GGGATGAGCGGGCCTTTGAT      | [6]       |
| papGII-R                           | CGGGCCCCCAAGTAACTCG       |           |
| papGIII-1                          | GGCCTGCAATGGATTTACCTGG    | [6]       |
| papGIII-2                          | CCACCAAATGACCATGCCAGAC    |           |
| neuA-F                             | ATGATTACTCGACACTGTC       | [7]       |
| neuA-R                             | AACAATCTCCGCTATTTTCG      |           |
| iutA-F                             | GGCTGGACATCATGGGAACTGG    | [2]       |
| iutA-R                             | CGTCGGGAACGGGTAGAATCG     |           |
| cnf1-F                             | AGACGATTTTATCAATGACCCC    | [8]       |
| cnf1-R                             | CAAAAGACAGACCAAGCAATAC    |           |
| sat-F                              | ACGGTCAGGGATTTACATTT      | [9]       |
| sat-R                              | GCTATTTGGCTGTTATGTGC      |           |
| fimH-F                             | CATTCGCCTGTAAAACCGCC      | [10]      |
| fimH-R                             | ATAACACGCCGCCATAAGCC      |           |
| hlyA-F                             | AGCAATGCAGATGCAGATAC      | [8]       |
| hlyA-R                             | AATGGACAGGAATGAGAGGG      |           |
| <b>Phylogenetic grouping</b>       |                           | [11]      |
| chuA.1b                            | GACGAACCAACGGTCAGGAT      |           |

|           |                          |
|-----------|--------------------------|
| chuA.2    | TGCCGCCAGTACCAAAGACA     |
| yjaA.1b   | TGAAGTGTCTCAGGAGACGCTG   |
| yjaA.2b   | ATGGAGAATGCGTTCCTCAAC    |
| TspE4C2.1 | CACTATTCGTAAGGTCATCC     |
| TspE4C2.2 | AGTTTATCGCTGCGGGTCGC     |
| AceK.f    | AACGCTATTCGCCAGCTTGC     |
| ArpA1.r   | TCTCCCCATACCGTACGCTA     |
| ArpAgpE.f | GATTCCATCTTGTCAAAATATGCC |
| ArpAgpE.r | GAAAAGAAAAAGAATTCCCAA    |
| trpAgpC.1 | AGTTTTATGCCCAGTGCGAG     |
| trpAgpC.2 | TCTGCGCCGGTCACGCCC       |
| aesI-F    | CCTCTACTCACCCAAAAGTC     |
| aesI-R    | ATCACGTAACCACAACGCAC     |

---

#### References:

1. Tarchouna, M.; Ferjani, A.; Ben-Selma, W.; Boukadida, J. Distribution of uropathogenic virulence genes in *Escherichia coli* isolated from patients with urinary tract infection. *Int J Infect Dis* **2013**, *17*, e450-453, doi:10.1016/j.ijid.2013.01.025.
2. Guiral, E.; Bosch, J.; Vila, J.; Soto, S.M. Prevalence of *Escherichia coli* among samples collected from the genital tract in pregnant and nonpregnant women: relationship with virulence. *FEMS Microbiol Lett* **2011**, *314*, 170-173, doi:10.1111/j.1574-6968.2010.02160.x.
3. Nipic, D.; Podlesek, Z.; Budic, M.; Crnigoj, M.; Zgur-Bertok, D. *Escherichia coli* uropathogenic-specific protein, Usp, is a bacteriocin-like genotoxin. *J Infect Dis* **2013**, *208*, 1545-1552, doi:10.1093/infdis/jit480.
4. Mitsumori, K.; Terai, A.; Yamamoto, S.; Yoshida, O. Identification of S, F1C and three PapG fimbrial adhesins in uropathogenic *Escherichia coli* by polymerase chain reaction. *FEMS Immunol Med Microbiol* **1998**, *21*, 261-268, doi:10.1111/j.1574-695X.1998.tb01173.x.
5. Paniagua-Contreras, G.L.; Hernandez-Jaimes, T.; Monroy-Perez, E.; Vaca-Paniagua, F.; Diaz-Velasquez, C.; Uribe-Garcia, A.; Vaca, S. Comprehensive expression analysis of pathogenicity genes in uropathogenic *Escherichia coli* strains. *Microb Pathog* **2017**, *103*, 1-7, doi:10.1016/j.micpath.2016.12.008.
6. Johnson, J.R.; Brown, J.J. A novel multiply primed polymerase chain reaction assay for identification of variant papG genes encoding the Gal(alpha 1-4)Gal-binding PapG adhesins of *Escherichia coli*. *J Infect Dis* **1996**, *173*, 920-926, doi:10.1093/infdis/173.4.920.

7. Wang, M.C.; Lin, W.H.; Tseng, C.C.; Wu, A.B.; Teng, C.H.; Yan, J.J.; Wu, J.J. Role of K1 capsule antigen in cirrhotic patients with Escherichia coli spontaneous bacterial peritonitis in southern Taiwan. *Eur J Clin Microbiol Infect Dis* **2013**, *32*, 407-412, doi:10.1007/s10096-012-1757-9.
8. Tseng, C.C.; Wu, J.J.; Liu, H.L.; Sung, J.M.; Huang, J.J. Roles of host and bacterial virulence factors in the development of upper urinary tract infection caused by Escherichia coli. *Am J Kidney Dis* **2002**, *39*, 744-752, doi:10.1053/ajkd.2002.32992.
9. Mao, B.H.; Chang, Y.F.; Scaria, J.; Chang, C.C.; Chou, L.W.; Tien, N.; Wu, J.J.; Tseng, C.C.; Wang, M.C.; Chang, C.C.; et al. Identification of Escherichia coli genes associated with urinary tract infections. *J Clin Microbiol* **2012**, *50*, 449-456, doi:10.1128/JCM.00640-11.
10. Edelstein, M.; Pimkin, M.; Palagin, I.; Edelstein, I.; Stratchounski, L. Prevalence and molecular epidemiology of CTX-M extended-spectrum beta-lactamase-producing Escherichia coli and Klebsiella pneumoniae in Russian hospitals. *Antimicrob Agents Chemother* **2003**, *47*, 3724-3732, doi:10.1128/AAC.47.12.3724-3732.2003.
11. Clermont, O.; Christenson, J.K.; Denamur, E.; Gordon, D.M. The Clermont Escherichia coli phylo-typing method revisited: improvement of specificity and detection of new phylo-groups. *Environ Microbiol Rep* **2013**, *5*, 58-65, doi:10.1111/1758-2229.12019.
